# Supplementary material for: Infection with a Recently Discovered Gammaherpesvirus Variant in European Badgers, Meles meles, is Associated with Higher Relative Viral Loads in Blood
Source: MDPI journal article supplement (doi:10.3390/pathogens11101154), 2022-10-06
Supplement: s1 [file s1]

Table S1: List of samples with MusGHV-1 DNA variants and host details of tattoo ID, sex, age, natal group, social group and sett visited (obtained from previous capture records [1,2])

| Tattoo ID | Sex | Sample type         | Variant | Age at 2018 | Natal group | Social group | Sett visited         |
|-----------|-----|---------------------|---------|-------------|-------------|--------------|----------------------|
| 1012      | M   | Oral swab           | Common  | 13          | PO          | PO           | PO, SH               |
| 1232      | F   | Genital swab        | Common  | 10          | BB          | MT           | TR, MT, BB           |
| 1283      | M   | Genital swab        | Common  | 9           | JH          | JH           | JH                   |
| 1341      | M   | Oral swab           | Common  | 8           | GOO         | HC           | GOO, GO, HC, CP, KH  |
| 1354      | M   | Genital swab        | Common  | 10          | PO          | PO           | PO, P, JkBr, SH      |
| 1359      | F   | Oral swab           | Common  | 8           | JKBR        | JH           | JKBR, JH, PV         |
| 1372      | F   | Genital swab        | Common  | 8           | PO          | PO           | PO, P, SH            |
| 1378      | M   | Genital swab        | Common  | 8           | JH          | JH           | JH, P                |
| 1379      | M   | Genital swab        | Common  | >8          | CP          | CP           | CP, MT, Gates        |
| 1383      | M   | Genital swab        | Common  | 8           | GOO         | GOO          | GOO, GO              |
| 1445      | F   | Oral swab           | Common  | 8           | TC          | TC           | TC                   |
| 1469      | F   | Rectal swab         | Common  | 5           | TC          | TC           | TC                   |
| 1478      | F   | Oral swab           | Common  | 5           | JKBR        | JH           | JKBR, JH, CHO        |
| 1487      | M   | Genital swab, blood | Common  | 7           | MT          | JH           | JH, MT, PV, M2       |
| 1504      | M   | Genital swab        | Common  | 4           | HH          | HH           | HH, GAH, CLO         |
| 1512      | M   | Genital swab        | Common  | 4           | GOO         | RC           | GOO, RC              |
| 1516      | M   | Genital swab        | Common  | ?           | NC          | NC           | NC                   |
| 1520      | F   | Genital swab        | Common  | 4           | JH          | JH           | JHA, BB              |
| 1525      | M   | Genital swab        | Common  | 4           | P           | P            | P                    |
| 1549      | M   | Genital swab        | Common  | 4           | CP          | CP           | CP, Gates            |
| 1584      | M   | Genital swab        | Common  | 3           | P           | P            | P                    |
| 1592      | M   | Genital swab        | Common  | 4           | M2?         | M2           | M2, JH               |
| 1631      | F   | Genital swab        | Common  | 3           | MT          | BB           | BB, MT               |
| 1635      | M   | Genital swab        | Common  | 3           | CP?         | TC           | OL1, OLX, M2, HH, TC |
| 1641      | M   | Genital swab        | Common  | 2           | CP          | CP           | CP, OL1              |
| 1642      | F   | Genital swab        | Common  | 2           | CH          | CH           | CH                   |
| 1644      | M   | Genital swab        | Common  | 2           | GAH         | CLO          | CLO, GAH, HH         |
| 1647      | M   | Genital swab        | Common  | 2           | GAH         | GAH          | GAH, CLO             |
| 1668      | M   | Genital swab        | Common  | 2           | P           | P            | P, Hill End          |
| 1669      | F   | Genital swab        | Common  | 2           | GAH         | FB           | FB, GW               |
| 1678      | F   | Genital swab        | Common  | 2           | CH          | CH           | CH                   |
| 1694      | F   | Genital swab        | Common  | 2           | LS          | LS           | LS                   |
| 1696      | F   | Genital swab        | Common  | 2           | MT          | MT           | MT, TR, BB           |

|       |   |                     |             |    |         |         |                    |
|-------|---|---------------------|-------------|----|---------|---------|--------------------|
| 1699  | M | Genital swab        | Common      | 1  | JH      | JH      | JHA, JH            |
| 1713  | M | Genital swab        | Common      | 1  | GOO     | GOO     | GOO                |
| 1720  | M | Genital swab        | Common      | 1  | SH      | SH      | SH                 |
| 1722  | F | Genital swab        | Common      | 1  | GAH     | GAH     | GAH, FB, GW        |
| 1739  | F | Genital swab        | Common      | 0  | CP      | CP      | CP                 |
| 1742  | F | Genital swab        | Common      | 0  | BL      | BL      | McBr               |
| 1744  | M | Genital swab        | Common      | 0  | SW      | SW      | SW                 |
| 1745  | M | Genital swab        | Common      | 0  | SH      | SH      | SHO                |
| 1753  | F | Genital swab, blood | Common      | 0  | CH      | CH      | CH                 |
| 1756  | M | Genital swab        | Common      | 0  | FB      | FB      | FB, RC             |
| 1763  | M | Genital swab        | Common      | 0  | BB      | BB      | BB                 |
| 1776  | F | Genital swab        | Common      | 0  | Hedge   | Hedge   | Hedge              |
| 1777  | M | Genital swab        | Common      | 2  | FS Farm | FS Farm | OB                 |
| 1778  | M | Genital swab        | Common      | 0  | FS Farm | FS Farm | Road               |
| 1780  | F | Genital swab        | Common      | 0  | P       | P       | P                  |
| 1784  | M | Genital swab        | Common      | 0  | GAH     | GAH     | Ingrid B           |
| 1785  | F | Genital swab        | Common      | 0  | GAH     | GAH     | GAH, CLO           |
| 1787  | M | Genital swab        | Common      | 2  | CHO     | CHO     | CHO                |
| 1793  | M | Genital swab        | Common      | 0  | CHO     | CHO     | CHO                |
| 1234X | F | Genital swab        | Common      | 10 | BB      | MT      | TR, MT, BB, LS, JH |
| 1239F | F | Genital swab        | Common      | 10 | PO      | P       | PO, P              |
| 1737X | M | Genital swab        | Common      | 0  | MM      | MM      | MM                 |
| 1435  | F | Genital swab, blood | Coinfection | 6  | CH      | CH      | CH, GAH            |
| 1498  | F | Rectal swab         | Coinfection | 5  | BL      | CH      | BL, CH             |
| 1751  | F | Genital swab, blood | Coinfection | 0  | CH      | CH      | CH                 |
| 1755  | M | Genital swab, blood | Coinfection | 0  | CHO     | CHO     | CHO                |
| 1045X | F | Genital swab, blood | Coinfection | 13 | CHO     | CHO     | CHO, Ditch, GAH    |
| 1330  | M | Genital swab        | Novel       | 8  | GOO     | RC      | GOO, GOA, RC, HC   |
| 1622  | M | Genital swab        | Novel       | 3  | CP      | RC      | CP, RC, OL64, LS   |
| 1746  | F | Genital swab        | Novel       | 0  | CH      | CH      | CH                 |
| 1749  | F | Genital swab        | Novel       | 0  | CHO     | CHO     | CHO                |
| 1750  | F | Genital swab, blood | Novel       | 0  | CH      | CH      | CH                 |
| 1754  | M | Blood               | Novel       | 0  | CH      | RC      | CH, RC, CC, HSBC   |

---

Table S2: Ct values of MusGHV-1 genome by variant in 40 blood samples from badgers of previously known identity (Tattoo ID) and age class

| Tattoo ID | MusGHV-1 Variant (genital swab) | MusGHV-1 Variant (oral swab) | MusGHV-1 Variant (Blood) | Age     | Age Group | Ct value |        |        |
|-----------|---------------------------------|------------------------------|--------------------------|---------|-----------|----------|--------|--------|
|           |                                 |                              |                          |         |           | Spring   | Summer | Autumn |
| 1012      |                                 | Common (spring)              |                          | 13      | Very old  |          | 32.56  |        |
| 1045x     | Novel (autumn)                  |                              |                          | 13      | Very old  | 34.30    |        | 33.44  |
| 1234x     | Common (spring, summer)         |                              |                          | 10      | Very old  |          | 32.20  | 34.27  |
| 1232      | Common (autumn)                 |                              |                          | 10      | Very old  | 34.47    |        | 33.99  |
| 1283      | Common (summer)                 |                              |                          | 9       | Very old  | 36.51    | 35.90  |        |
| 1330      | Novel (summer)                  |                              |                          | 8       | Very old  |          | 34.23  |        |
| 1379      | Common (spring)                 |                              |                          | Unknown | Very old  | 36.16    |        | 33.74  |
| 1487      | Common (summer)                 |                              |                          | 7       | Old       | 34.97    |        | 35.99  |
| 1435      | Novel (summer)                  |                              | Dual (summer)            | 6       | Old       |          | 31.98  | 32.36  |
| 1478      |                                 | Common (summer)              |                          | 5       | Old       |          | 33.02  |        |
| 1520      | Common (spring)                 |                              |                          | 4       | Young     | 35.31    | 33.53  |        |
| 1622      | Novel (summer autumn)           |                              |                          | 3       | Young     | 32.33    | 30.13  |        |
| 1694      | Common (summer)                 |                              |                          | 2       | Young     |          | 32.32  | 33.74  |
| 1699      | Common (summer)                 |                              |                          | 1       | Juvenile  |          | 31.88  | 33.30  |
| 1735      |                                 |                              |                          | 0       | Juvenile  | 36.30    |        |        |
| 1746      | Novel (summer)                  |                              |                          | 0       | Juvenile  |          | 28.67  |        |
| 1749      | Novel (spring)                  |                              |                          | 0       | Juvenile  | 27.10    |        |        |
| 1750      | Novel (summer)                  |                              | Novel (summer)           | 0       | Juvenile  |          | 28.74  | 29.99  |
| 1751      | Novel (autumn)                  |                              | Dual (summer)            | 0       | Juvenile  | 30.77    | 30.12  | 30.94  |
| 1753      | Common (spring)                 |                              | Common (summer)          | 0       | Juvenile  | 32.74    |        |        |
| 1754      |                                 |                              | Novel (summer)           | 0       | Juvenile  | 30.04    |        |        |
| 1755      | Novel (summer)                  |                              | Dual (summer)            | 0       | Juvenile  | 28.87    | 31.55  | 31.74  |
| 1778      | Common (summer)                 |                              |                          | 0       | Juvenile  |          | 29.97  |        |
| 1785      | Common (summer)                 |                              |                          | 0       | Juvenile  |          |        | 30.51  |

Table S3: Counts of individuals infected with the common or novel MusGHV-1 variant categorized by sex, age class and social groups. There was no significant difference in novel variant prevalence based on sex or age class (Fisher's test:  $p>0.05$ ); however, individuals infected with the MusGHV-1 novel variant all resided in just 3 (of 25) social groups (CH, CHO, RC), producing a marginally significant spatial pattern.

Table S4: List of samples tested for MusGHV-1 in blood and genotyping

| Badger ID | Sampling month | Social group | Sex    | Age | MusGHV-1 Variant |
|-----------|----------------|--------------|--------|-----|------------------|
| 1045x     | Nov-09         | CHO          | Female | 4   | Novel+Common     |
| 1155      | Jun-10         | CHO          | Female | 3   | Common           |
| 1168      | Jun-10         | CH           | Female | 3   | Common           |
| 1273      | Nov-09         | CH           | Female | 0   | Common           |
| 1332      | Jun-10         | CHO          | Male   | 0   | Common           |
| 1335      | Jun-10         | CHO          | Female | 0   | Novel            |
| 1366      | Sep-10         | CHO          | Male   | 0   | Novel            |
| 1368      | Sep-10         | CHO          | Female | 0   | Common           |
| 1115      | Nov-09         | RC           | Female | 3   | Common           |
| 1133      | Nov-09         | RC           | Male   | 2   | Common           |
| 1165      | Nov-09         | RC           | Male   | 2   | Common           |
| 1292      | Sep-09         | RC           | Female | 0   | Common           |
| 1346      | Jun-10         | RC           | Male   | 0   | Common           |
| 1342      | Jun-10         | RC           | Female | 0   | Common           |

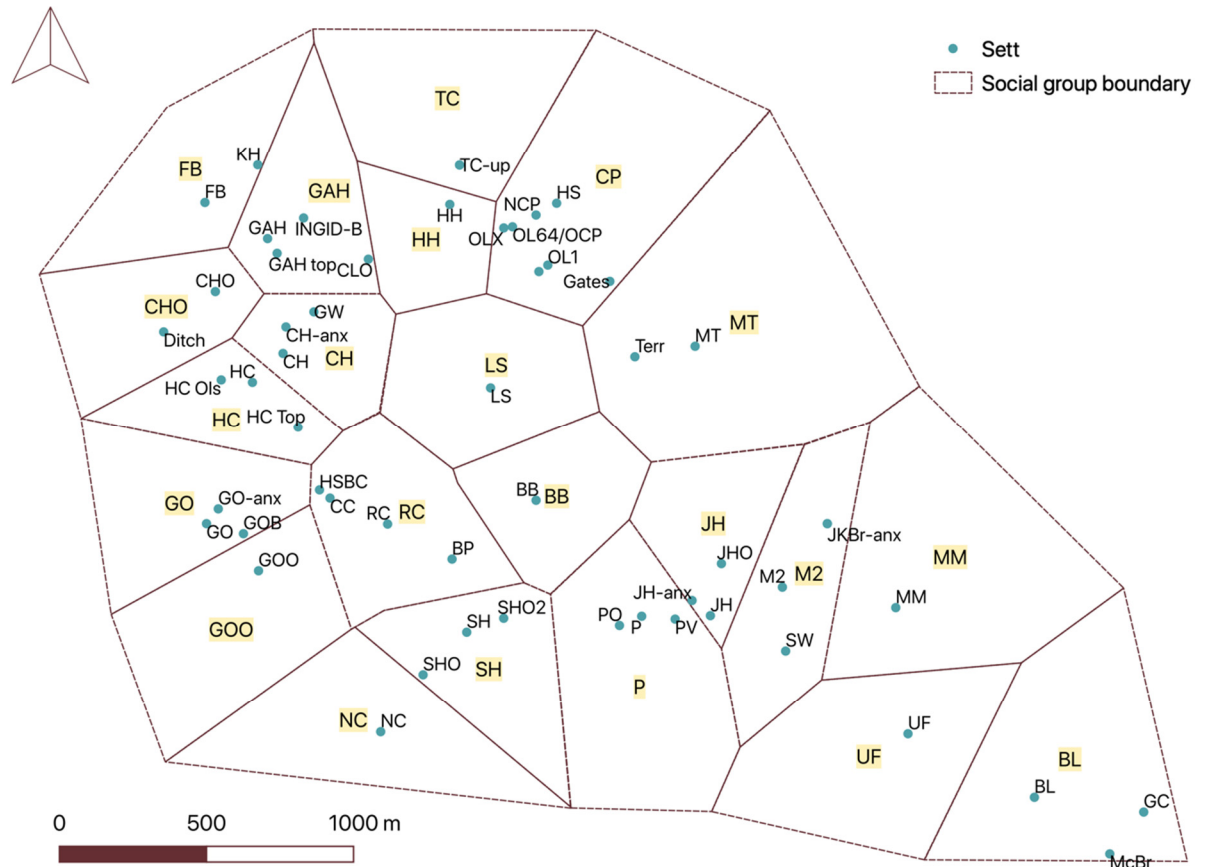

Figure S1: Location of badger setts and range of social groups in Wytham Wood

#### References:

1. Macdonald, D.W.; Newman, C.; Buesching, C.D. Badgers in the rural landscape—conservation paragon or farmland pariah? Lessons from the Wytham Badger Project. *Wildl. Conserv. Farml. Vol. 2* **2015**, *2*, 65–95, doi:10.1093/acprof:oso/9780198745501.003.0004.
2. Sugianto, N.A.; Newman, C.; Macdonald, D.W.; Buesching, C.D. Heterochrony of puberty in the European badger (*Meles meles*) can be explained by growth rate and group-size: Evidence for two endocrinological phenotypes. *PLoS One* **2019**, *14*, 1–21, doi:10.1371/journal.pone.0203910.
